# Supplementary material for: Intestinal oligopeptide transporter PepT1-targeted polymeric micelles for further enhancing the oral absorption of water-insoluble agents
Source: Royal Society of Chemistry journal article supplement (doi:10.1039/c9nr07029j), 2019-01-01
Supplement: c9nr07029j1.pdf [file c9nr07029j1.pdf]

## Supporting Information

### **Intestinal oligopeptide transporter PepT1-targeted polymeric micelles for further enhancing oral absorption of water-insoluble agents**

Yao Jin, Qi Liu, Chuhan Zhou, Xinping Hu, Leqi Wang, Shidi Han, Yuanhang Zhou, Yan Liu\*

*Beijing Key Laboratory of Molecular Pharmaceutics and New Drug Delivery Systems,  
School of Pharmaceutical Sciences, Peking University, Beijing 100191, China*

\*Corresponding author. Phone: 86 10 82801508; e-mail: [yanliu@bjmu.edu.cn](mailto:yanliu@bjmu.edu.cn)

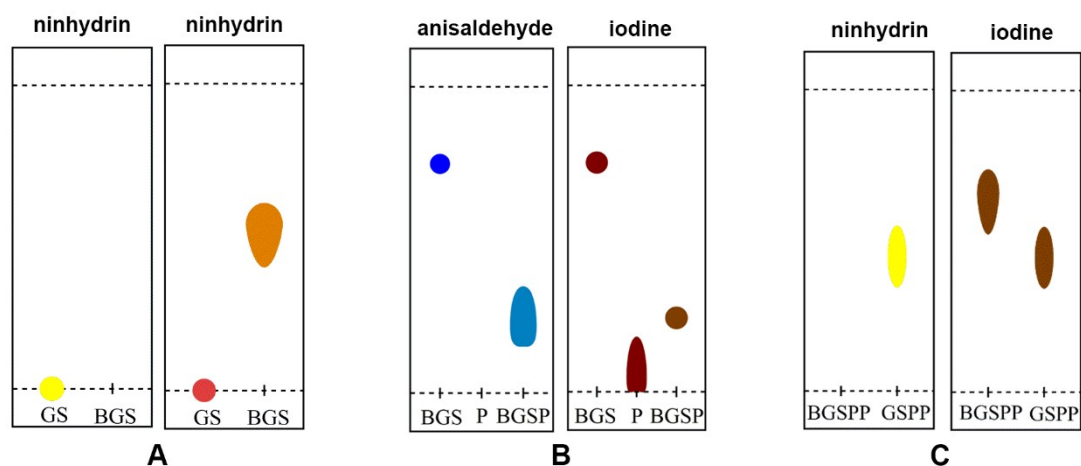

**Fig. S1** (A) The TLC results of Gly-Sar (GS) and Boc-Gly-Sar (BGS) heated with hair dryer (left) and far infrared light (right). BGS was colorless at lower temperature and colored at higher temperature. (B) The TLC results of Boc-Gly-Sar (BGS), PEG (P) and Boc-Gly-Sar-PEG-OH (BGSP). Anisaldehyde (left) and iodine (right) were used as color reagent. (C) The TLC results of Boc-Gly-Sar-PEG-b-PLA (BGSP) and Gly-Sar-PEG-b-PLA (GSPP). Ninhydrin (left) and iodine (right) were used as color reagent.

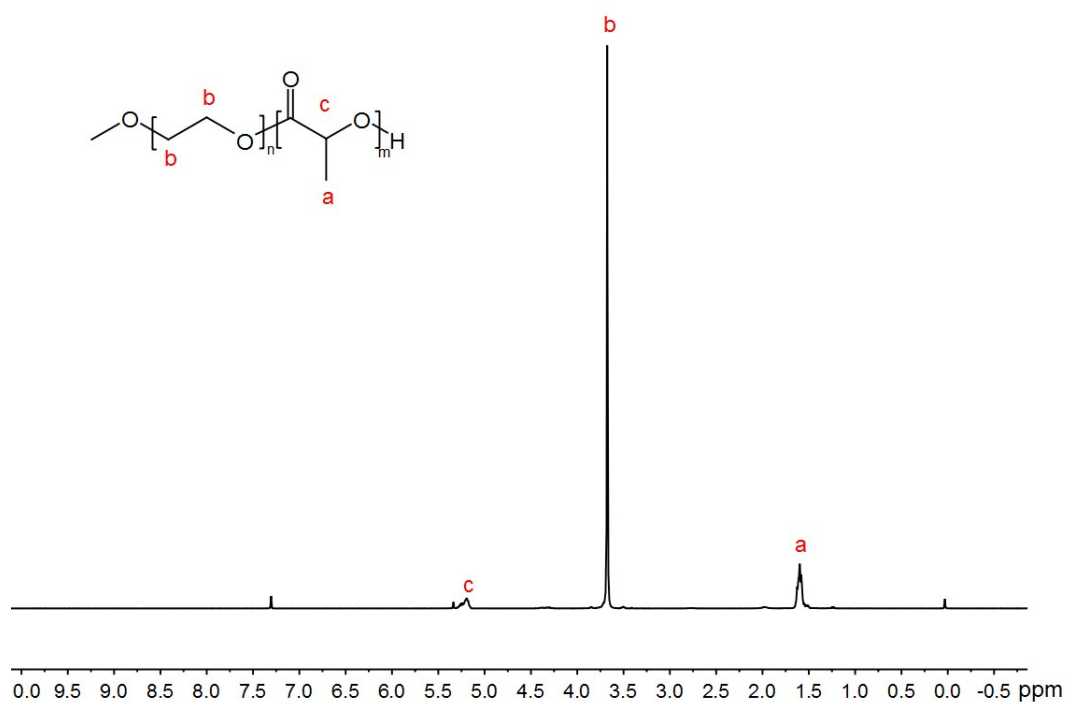

**Fig. S2**  $^1\text{H}$ -NMR spectrum of mPEG-*b*-PLA in  $\text{CDCl}_3$ .

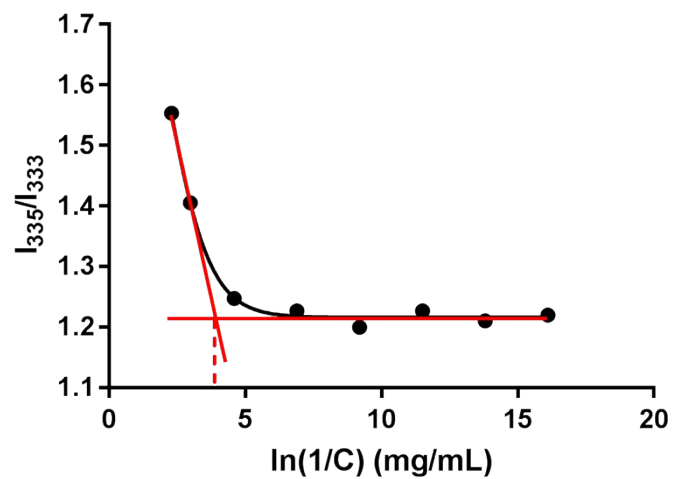

**Fig. S3** Plot of  $I_{335}/I_{333}$  vs  $\ln(1/C)$  of mPEG-b-PLA.

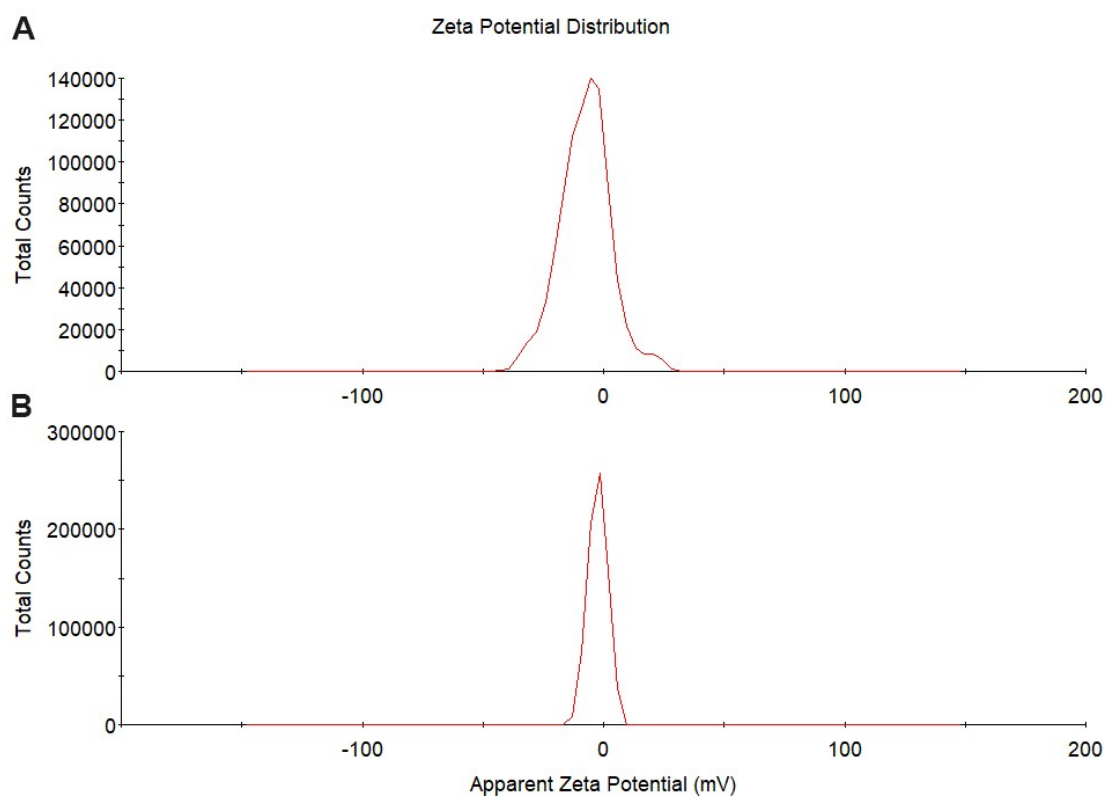

**Fig. S4** The apparent zeta potential of C6/PP-PMs (A) and C6/GS-PP-PMs (B).

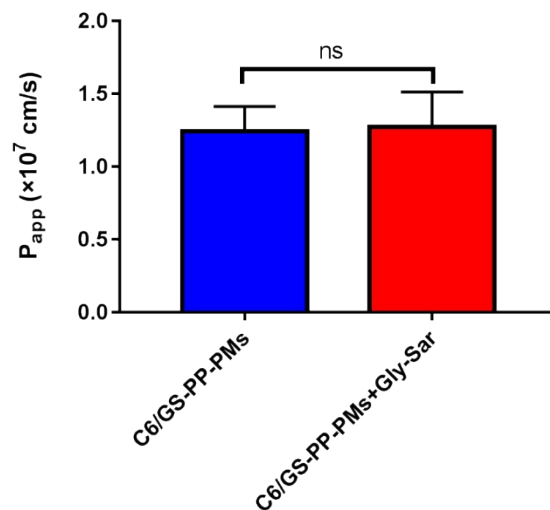

**Fig. S5** The effect of Gly-Sar on the transmembrane transport of C6/GS-PP-PMs ( $n=3$ ).  $^{ns}p>0.05$ .

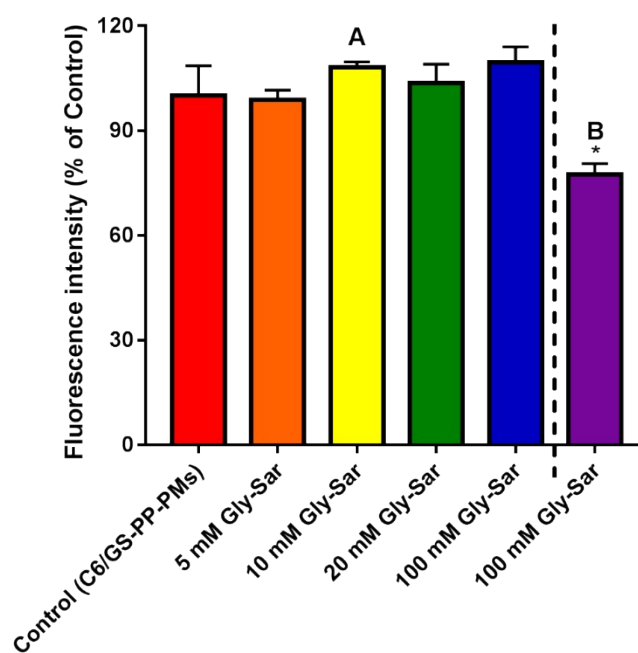

**Fig. S6** The effect of Gly-Sar on the uptake of C6/GS-PP-PMs by Caco-2 cells. Incubation of C6/GS-PP-PMs and free Gly-Sar with Caco-2 cells for 1 h (A) and 20 min (B).  $*p<0.05$ .
